## PROFESSIONAL NOTES

On May 6 and 7, 1966 a group of scholars representing many disciplines met in Washington, D. C. to form the Latin American Studies Association. According to the constitution adopted at the meeting, the purposes of the Association are "to provide a professional organization that will foster the concerns of all scholars interested in Latin American studies, and will encourage more effective training, teaching, and research in connection with such studies, and will provide both a forum and an instrument for dealing with matters of common interest to the scholarly professions and to individuals concerned with Latin American studies." The constitution sets up three categories of membership: Members, Associates, and Institutional Associates. It stipulates: "Members shall be elected from among scholars whose professional commitment and attainment in Latin American studies, or whose professional careers have made substantial contributions to the development of scholarship in the various disciplines of the field. Associates shall be elected from among other individuals interested in scholarly matters relating to Latin America. Institutional Associates shall be elected from among institutions and organizations interested in scholarly matters relating to Latin America." Annual dues for Members will be \$7, for Associates \$5, for Institutional Associates \$10, and for graduate students \$3. The office of the Association is at the Hispanic Foundation of the Library of Congress.

The officers elected at the constituent meeting were Kalman Silvert, president; Richard N. Adams, vice president; and Stanton Catlin, Howard F. Cline, John E. Englekirk, Federico Gil, Kenneth L. Karst, William P. McGreevey, and Kempton Webb, members of the Executive Committee.

The Ford Foundation has announced grants for international training and research to the University of Kansas (\$200,000 for Latin American studies), to Yale University (\$6,300,000 for expansion of world-affairs training

and research, including Latin American studies), to Cornell University (\$60,000 for the Cornell Latin American Year Conferences) to the Institute of International Education (\$2,000,000 for a program of collaboration between the Universities of Chile and California), and to the Federal University of Minas Gerais (\$657,000 to assist in the establishment of a department of political science).

The United States coordinators for the grant to Minas Gerais are Professors Gabriel A. Almond and Robert A. Packenham of Stanford University. They will assist the Brazilian university to recruit visiting professors and to place Brazilian graduate students and younger faculty members for graduate work and advanced study in universities in this country. Funds are available for visiting professors, for graduate researchers, and for visiting consultants.

The Sixth International Colloquium on Luso-Brazilian Studies will be held from September 7 to 12, 1966 at Harvard University, Columbia University, and the Hispanic Society of America. For further information write to the Colloquium at Boylston Hall, Harvard University, Cambridge, Massachusetts 02138.

The Newberry Library announces the inauguration of the Kenneth Nebenzahl, Jr. Lectures in Historical Cartography on October 27 and 28 and November 10 and 11, 1966. The lecturer will be R. A. Skelton, Superintendent of the Map Room of the British Museum. Mr. Skelton will survey the study and collecting of early maps and will review the evolution of historical maps and the influence of maps of the past on contemporary geographical thought at different periods in history. Visiting scholars will participate in round table discussions on the needs and opportunities in the field of historical cartography. Further details on the lectures may be obtained from Lawrence W. Towner, Director of the Newberry Library, 60 West Walton Street, Chicago, Illinois 60610.
